# Detect mTBI in pediatric populations using a tablet-based software BrainCheck

Siao Ye<sup>1</sup>, Brian Ko<sup>2</sup>, Huy Phi<sup>3</sup>, David M. Eagleman<sup>4</sup>, Benjamin Flores<sup>5</sup>, Yael Katz<sup>5</sup>, Bin Huang<sup>5\*</sup>, Reza Hosseini Ghomi<sup>5\*</sup>

<sup>1</sup>Department of Biosciences, Rice University, Houston, TX, USA

<sup>2</sup>University of Washington School of Medicine, Seattle, WA, USA

<sup>3</sup>College of Arts and Sciences, University of Washington, Seattle, WA, USA

<sup>4</sup>Department of Psychiatry and Behavioral Sciences, Stanford University School of Medicine, Stanford, CA, United States

<sup>5</sup>BrainCheck, Inc, Houston, TX, USA

\*Corresponding Author: B.H. ([bin@braincheck.com](mailto:bin@braincheck.com)) and R.G. ([reza@braincheck.com](mailto:reza@braincheck.com)).

## Keywords:

mTBI, Concussion, BrainCheck, Neurocognitive testing

## **Abstract:**

Despite its high frequency of occurrence, mild traumatic brain injury (mTBI), or concussion, is difficult to recognize and diagnose, particularly in pediatric populations. Conventional methods to diagnose mTBI primarily rely on clinical questionnaires and sometimes include imaging such as computed tomography (CT) or pencil and paper neuropsychological testing. However, these methods are time consuming, require administration/interpretation from health professionals, and lack adequate test sensitivity and specificity. We explore the use of BrainCheck, a computerized neurocognitive test that is available on iPad, iPhone or computer desktop, for mTBI assessment. The BrainCheck battery consists of 6 gamified traditional neurocognitive tests that assess areas of cognition vulnerable to mTBI such as attention, processing speed, executing functioning, and coordination. We administered BrainCheck to 10 participants diagnosed with mTBI at the emergency department (ED) of Children's hospital within 96 hours of admittance to the ED, and 126 normal controls at a local high school. Statistical analysis included Chi-Square tests, Analysis of Variance (ANOVA), independent sample t-tests, and Hochberg tests to examine differences between mTBI, diagnoses by current gold standard clinical exam, and control groups on each assessment in the battery. Significant metrics from these assessments were used to build a logistic regression model that distinguishes mTBI from non-mTBI participants. Receiver operator score (ROC) analysis of our logistic regression model found a sensitivity of 84% and specificity of 80%. BrainCheck has potential in distinguishing mTBI from non-mTBI participants, by providing a shorter, gamified test battery to assess cognitive function after brain injury, while also providing a method for tracking recovery with the opportunity to do so remotely from a patient's home.

## **Background**

Mild traumatic brain injury (mTBI) is an increasing public health concern not only due to its growing frequency of occurrence but lack of guidelines and biomarkers that make diagnosis challenging (Lumba-Brown et al., 2018). Recent evidence also indicates an association to the development of neurodegenerative diseases (Sullivan, 2019). This is particularly concerning in the pediatric population whose ongoing cognitive maturation makes them more vulnerable to head injury than the adult population (Boutis, Weerdenburg, Koo, Schneeweiss, & Zemek, 2015). The diagnostic utility of neuroimaging is limited and current recommendations do not recommend routine imaging for mTBI unless otherwise clinically indicated (Lumba-Brown et al., 2018). Furthermore, literature evaluating sports-related concussions (SRCS) has indicated that young athletes with mTBI may not recognize alarming symptoms due to a lack of awareness, understanding, or as a result of their cognitive impairment (Halstead, Walter, & Fitness, 2010). Thus, self-reported post-concussion symptoms are not reliable in this population. Additionally, while there are several concussion grading systems, there is little agreement between the systems on how they define and assess mTBI, and a collectively agreed gold-standard grading system does not exist (Leclerc, Lassonde, Delaney, Lacroix, & Johnston, 2001). Self-reporting concussion symptoms is often at odds with social pressures on a younger person to perform both educationally and athletically and places a strong bias making these measures more inaccurate (Meier et al., 2015).

Although neuropsychological tests were developed to more accurately measure cognitive deficits in mTBI, these tests have their limitations. Typically they require a neuropsychologist or psychometrist to administer, score, and interpret the results of the battery of tests. More importantly, they lack adequate test sensitivity and specificity, and are susceptible to practice effects which occur when tests are repeated more than once (Hinton-Bayre, Geffen, Geffen, McFarland, & Frijs, 1999).

BrainCheck is an alternative solution to mTBI assessment that is rapid and self-administered. BrainCheck Sport battery is a computerized neurocognitive test that assesses various areas of

cognition, such as attention, processing speed, coordination, and executive functioning. Its diagnostic accuracy was previously validated as a testing method for traumatic brain injuries and it is classified as a diagnostic aid by the FDA (Yang et al. 2017) . We also evaluated the differences between 10 pediatric participants with mTBI diagnosed by physicians at the Emergency Department and 126 control subjects at a local high school on their Braincheck battery assessments and utilized the subsequent metrics to build a logistic regression model that distinguishes mTBI from non-mTBI participants. Receiver operator score (ROC) analysis of our logistic regression model found a sensitivity of 84% and specificity of 81%, which confirmed Braincheck's potential in assessing cognitive function after brain injury, while also providing a method for tracking recovery remotely from a patient's home. Thus, the primary objective of this study is to assess the utility of BrainCheck as a diagnostic tool in evaluating mTBI in the pediatric population.

## **Methods**

This study was approved by the Baylor College of Medicine institutional review board. It took place at the emergency department (ED) of Texas Children's Hospital (TCH) in Houston, TX and Morton Ranch High School in Katy, TX. We recruited 136 participants in this study, which includes 126 participants in the control group and 10 participants in the mTBI group. Subjects were included in the study if they received an official physician's diagnosis of mTBI. The recruited volunteers aged from 8 to 26 years, were either enrolled in athletic programs at Morton Ranch or patients at the TCH ED. For the control group we used baseline tests from healthy Morton Ranch athletes, aged 13 to 18 years. One outlier had an extremely high score in the Digit Symbol Substitution Task was removed. After excluding participants who had a history of mTBI or malingered, we were left with 122 participants in the control group and 9 participants in the mTBI group.

### *Test Administration*

mTBI participants were administered Version 3 of the BrainCheck Sport battery on the iPad within 96 hours of injury by an ED nurse if recruited at TCH or by an athletic trainer if recruited

by Morton Ranch. Control participants, composed of Morton Ranch athletes, were administered the BrainCheck test by a research coordinator prior to the athletic season. Prior to the actual BrainCheck test battery, mTBI participants took the Post mTBI Symptom Scale derived from the SCAT3.

### Test Measures

A short description of each assessment that comprises the BrainCheck battery are listed in Table 1. A more detailed description provided of the battery has been described previously (Yang et al., 2017).

Table 1. Neuropsychological assessments in BrainCheck battery

| <b>Assessment</b>         | <b>Description</b>                                                                                                                                                                                                                                                                                                                                    | <b>Measurement</b>                         |
|---------------------------|-------------------------------------------------------------------------------------------------------------------------------------------------------------------------------------------------------------------------------------------------------------------------------------------------------------------------------------------------------|--------------------------------------------|
| Flanker                   | We presented participants with a target arrow pointing to the left or right. The target was surrounded by congruent (> > > >), or incongruent (<< <<) arrows. Participants identified the direction of the target as quickly and accurately as possible.                                                                                              | Reaction time                              |
| Digit Symbol Substitution | Participants must match an arbitrary correspondence of symbols to digits; when presented with a new symbol, they input as quickly as possible the corresponding digit.                                                                                                                                                                                | Cognitive processing                       |
| Stroop                    | Participants are instructed to find a word matching the given name of a color. There are two types of trials: CONGRUENT in which the word name and font color are the same (e.g., the word RED presented in red font), and INCONGRUENT in which the word name indicates a different color than the font (e.g., the word RED presented in green font). | Cognitive executive function               |
| Trail Making              | Participants are instructed to connect a set of 25 dots in their correct order as rapidly as possible. Trail Making Test A uses only numbers (1 through 25), while Trail Making Test B employs alternating letters and numbers (1 – A – 2 – B – 3 – C - ...).                                                                                         | Visual attention and cognitive flexibility |
| Coordination              | A ball is displayed on the tablet, moving according to the tilt of the tablet. A participant holds the tablet                                                                                                                                                                                                                                         | Coordination ability                       |

|                                   |                                                                                                                                                                                                                                                                                                                                                      |        |
|-----------------------------------|------------------------------------------------------------------------------------------------------------------------------------------------------------------------------------------------------------------------------------------------------------------------------------------------------------------------------------------------------|--------|
|                                   | out in front at arm’s length, and tilts it appropriately to keep the ball in a central circle.                                                                                                                                                                                                                                                       |        |
| Immediate and Delayed Recognition | First, immediate recall is measured by serially displaying 10 words, and then asking whether a word was just seen—either a distractor word or a target word (20 trials). At the end of the testing battery, without seeing the original list again, participants are again presented with 20 words and asked whether each word was presented before. | Memory |

### Statistical Analyses

Chi-square tests and Analysis of Variance (ANOVA) were used to examine differences in age and gender in the mTBI and control groups. Independent sample t-tests were used to compare groups on each assessment metric and the Hochberg test was used to adjust p values for multiple comparisons. For each kind of assessment, only the most significant metric was used in our logistic regression model. Sensitivity and specificity of the overall battery was evaluated using receiver operating characteristic (ROC) curve analyses with a cutoff score that represented the maximum values sensitivity and specificity could reach. Data analysis was performed using the R statistical programming language in RStudio version 3.3.1.

## **Results**

### Demographics

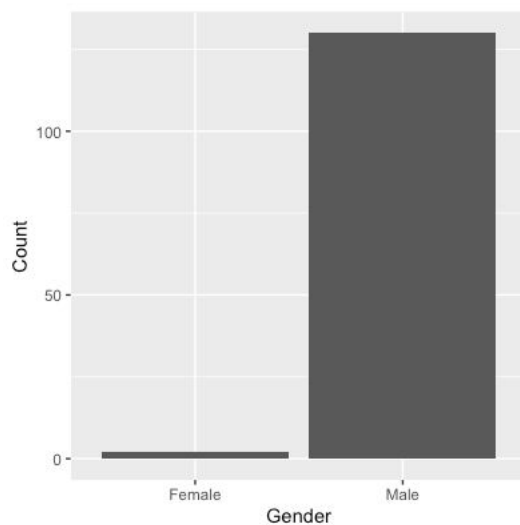

Figure 1. Gender distribution of participants

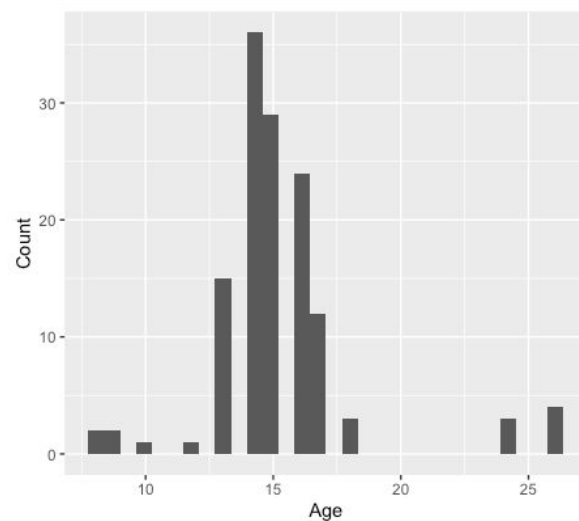

Figure 2. Age distribution of participants

The overall gender distribution was unbalanced because most athletes participated in the study were males. Nevertheless, there was no statistically significant difference in gender between patients and controls (X-squared (1) = 0.005,  $p = -0.94$ ). Similarly, no significant difference in age was detected between patients and controls ( $F(1, 130) = 0.016, p = 0.9$ ).

### Assessments scores on mTBI

The Braincheck assessments evaluate different cognitive domains of patients. As shown in Figure 3 and Table 2 below, we found that mTBI and control participants showed significantly difference on raw scores of delayed recall ( $t_{61.5} = 4.409, p < 0.01$ ), immediate recall ( $t_{52.4} = 4.8192, p < 0.01$ ), the Stroop test ( $t_{61.6} = -4.693, p < 0.01$ ), and the Coordination test ( $t_{79.8} = 3.7075, p < 0.01$ ). In contrast, no difference was detected on the Trail Making test ( $t_{72.4} = -0.64, p = 0.52$  for trails A,  $t_{66.7} = -0.83, p = 0.4$  for trails B), the Flanker test ( $t_{62.8} = 2.0934, p = 0.056$ ) and the Digit Symbol Substitution test ( $t_{45} = -2.0879, p = 0.056$ ).

Table 2. Benjamini-Hochberg adjusted P value for assessment comparison between mTBI group and control group.

| Assessment   | Metrics                                  | Adjusted p value | Explanation                                    |
|--------------|------------------------------------------|------------------|------------------------------------------------|
| Coordination | <b>balance_mean_distance_from_center</b> | <b>0.02</b>      | <b>Mean radial distance from center circle</b> |
|              | <b>balance_percent_in_target_mean</b>    | <b>0.001</b>     | <b>Mean of percentage time in circle</b>       |
|              | <b>balance_position</b>                  | <b>0.02</b>      | <b>Mean position from the circle center</b>    |
|              | <b>balance_total_duration_in_circle</b>  | <b>0.0015</b>    | <b>Total duration time in circle</b>           |
|              | <b>balance_total_duration_out_circle</b> | <b>0.0015</b>    | <b>Total duration time out of circle</b>       |

|                           |                                        |       |                                                                                                                    |
|---------------------------|----------------------------------------|-------|--------------------------------------------------------------------------------------------------------------------|
|                           | balance_total_duration_unpressed       | 0.76  | Total duration time not pressing the screen                                                                        |
|                           | balance_total_number_exits             | 0.92  | Total number of times existing the circle                                                                          |
| Digit Symbol Substitution | digit_symbol_correct_per_second_mean   | 0.58  | Mean of correct responses in a second                                                                              |
|                           | digit_symbol_duration                  | 0.094 | Total time taken to complete assessment. Time starts after digit display and ends when correct answer is completed |
| Flanker                   | flanker_correct_mean                   | 0.094 | Mean of correct responses                                                                                          |
|                           | flanker_reaction_time_central_mean     | 0.58  | Mean reaction time of all correct responses in central cue trials                                                  |
|                           | flanker_reaction_time_congruent_mean   | 0.92  | Mean of all reaction times when arrows point in same direction                                                     |
|                           | flanker_reaction_time_correct_mean     | 0.48  | Mean reaction time of all correct responses                                                                        |
|                           | flanker_reaction_time_correct_median   | 0.38  | Median reaction time of all correct responses                                                                      |
|                           | flanker_reaction_time_incongruent_mean | 0.58  | Mean of all reaction times when arrows point in opposite directions                                                |
|                           | flanker_reaction_time_incorrect_mean   | 0.48  | Mean reaction time of all incorrect responses                                                                      |



|                                          |                                                |               |                                                                                |
|------------------------------------------|------------------------------------------------|---------------|--------------------------------------------------------------------------------|
|                                          | flanker_reaction_time_spatial_mean             | 0.83          | Mean reaction time of all correct responses in spatial cue trials              |
| <b>Immediate and Delayed Recognition</b> | <b>delayed_recall_correct</b>                  | <b>0.0004</b> | <b>Number of correct responses</b>                                             |
|                                          | <b>immediate_recall_correct</b>                | <b>0.0002</b> | <b>Number of correct responses</b>                                             |
| Stroop                                   | stroop_basic_reaction_time_mean                | 0.79          | Mean reaction time for neutral words                                           |
|                                          | stroop_basic_reaction_time_median              | 0.92          | Median reaction time for neutral words                                         |
|                                          | <b>stroop_effect_ms_mean</b>                   | <b>0.001</b>  | <b>Mean reaction time incongruent - congruent (in ms)</b>                      |
|                                          | <b>stroop_effect_ratio</b>                     | <b>0.0002</b> | <b>Median reaction time of incongruent / median reaction time of congruent</b> |
|                                          | <b>stroop_reaction_time_congruent_mean</b>     | <b>0.015</b>  | <b>Mean reaction time for all correct answers in congruent trials</b>          |
|                                          | <b>stroop_reaction_time_incongruent_median</b> | <b>0.048</b>  | <b>Mean reaction time for all correct answers in incongruent trials</b>        |
| Trail Making                             | trails_b_duration_median                       | 0.58          | Median of response times between each click for Trail Making B                 |
|                                          | trails_b_duration_mean                         | 0.55          | Mean of all response times between clicks for Trail Making B                   |
|                                          | trails_a_duration_mean                         | 0.69          | Mean of all response times between clicks for Trail Making A                   |

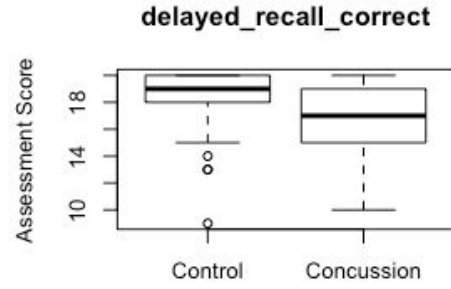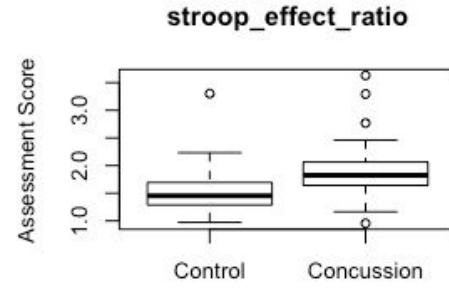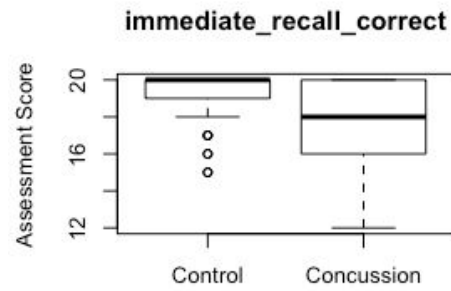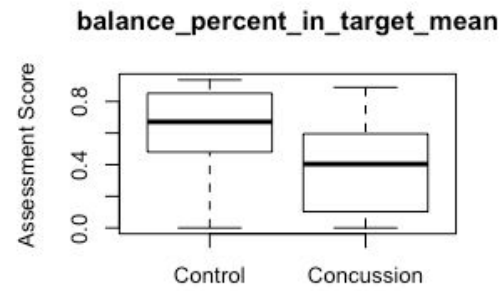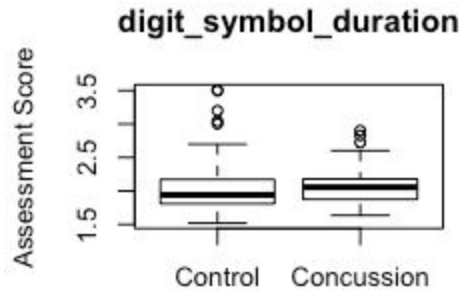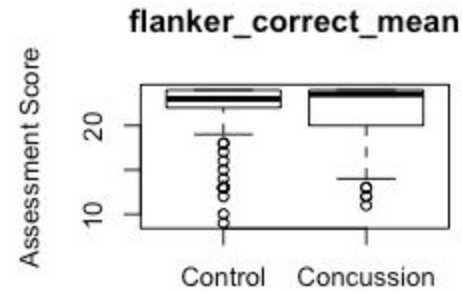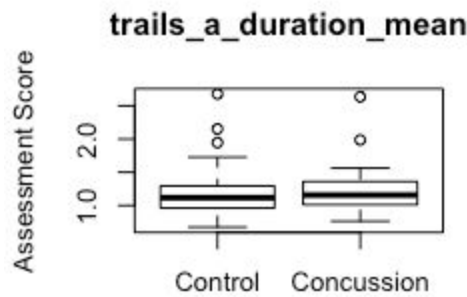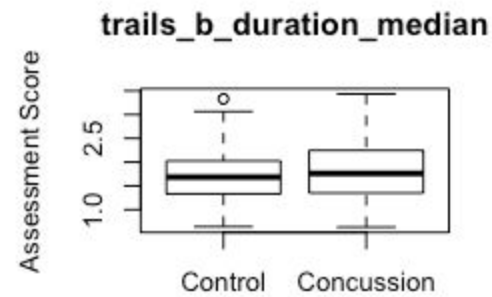

Figure 3. Boxplots of Braincheck assessments metrics for the control group and the mTBI group.

Our results demonstrate that objects that suffered from mTBI exhibited worse performance in Braincheck's assessments of memory, executive and coordination on the battery, which are in consistence with studies conducted golden standard neuropsychological tests (Lovell et al. 2003; Ting et al. 2016; Guskiewicz 2003). In addition, they showed no significant deterioration in their cognitive performance and attention, which has also been observed in previous studies (Leininger et al. 1990; Collins et al. 1999).

### Logistic regression

In our logistic regression model, 30 observations were deleted due to missing data, therefore it utilized 92 of the participants in our control group and 9 of the participants in our mTBI group. We used "delayed\_recall\_correct", "stroop\_effect\_ratio", "immediate\_recall\_correct", "balance\_percent\_in\_target\_mean", "digit\_symbol\_duration", "flanker\_correct\_mean", "trails\_a\_duration\_mean", "trails\_b\_duration\_median" as factors in our model. Based on the logistic model, the Stroop test, the Immediate Recall test, the Coordination and Trail-making were statistically significant at  $\alpha = 0.1$ , while the rest were not statistically significant. Here, we used receiver operating characteristic (ROC) analysis methods to determine the optimal threshold for the logistic regression model so that the model could achieve the maximum sensitivity and specificity to distinguish between control and mTBI group. We found that the BrainCheck Sport battery could achieve a sensitivity of approximately 84% and a specificity of 81% when we chose 0.3 as the optimal decision threshold (Refer to ROC curve in Figure 4). In other words, if the model predicted probability for a subject is greater than 0.3, the subject is categorized to the mTBI group.

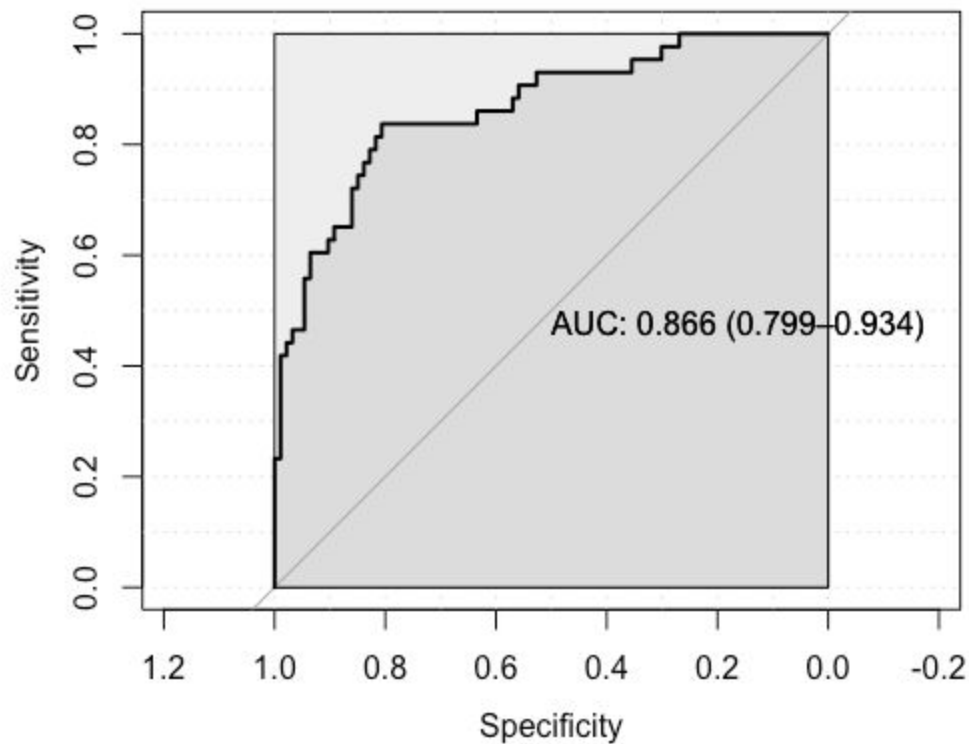

Figure 4. ROC curve of logistic regression.

## Discussion

The findings of this study demonstrated that BrainCheck Sport is able to discriminate mTBI patients from the control group on some battery assessments, and achieves decent levels of sensitivity (84%) and specificity (81%) when classifying mTBI. This is achieved by evaluating the cognitive function, memory, and coordination of the participants under tests. The results reflect that Braincheck Sport would be as effective of a diagnostic aid in the pediatric population as it would be in the adult population (Yang et al., 2017).

Our results demonstrate that after mTBI, patients experience deficits on immediate and delayed recall tests; balance and coordination tests; and the Stroop color tests which represent deficits in cognitive domains consisting of short term memory; coordination; and executive function, specifically inhibition and attention, respectively. These are typical symptoms observed after

concussions. We did not observe degradation in patient performance on trail making; digit-symbol substitution; or the Flanker tests which represent cognitive domains consisting of executive function, specifically, cognitive flexibility; information processing and speed; and visual attention, respectively. As suggested by previous studies, not all cognitive domains of concussion patients will be affected (Leininger et al. 1990; Collins et al. 1999). However, De Beaumont et al. (2009) found that athletes with concussion history performed worse in the Flanker Test. This might be due to the repeated injuries these athletes sustained and became significant over time. In our study we excluded participants with mTBI history, and participants were relatively young. Therefore, it is likely their symptoms differ from those who have experienced repeated concussions over time and are older. On the other hand, the majority of our participants are only assessed within 48 hours after injury leaving time for symptoms to possibly resolve. Further studies should control for time of administration after injury more stringently by restricting the timeframe to within 24 hours or less.

It is important to keep in mind that our participants were from an atypical population. The control group used was composed of athletes and was not fully representative of the pediatric population. Since the mTBI experimental group included both sports related and non-sports related mTBIs, a control group with similar demographics would have contributed to a more balanced design. We also sacrificed statistical power with a smaller mTBI group, which may have resulted in less separation of groups in our significance tests. A larger experimental group with more individuals in the mTBI group would likely give more robust results. It is possible to have a large range of symptoms after concussion with a range of cognitive impairment which is likely present in our data. Having a larger dataset would minimize the effects of this variation within the concussion population. In addition, both our experimental and control groups were composed of only a few females. Such gender differences in mTBI injury severity have been reported in previous literature (Munivenkatappa, Agrawal, Shukla, Kumaraswamy, & Devi, 2016). To investigate whether there are gender differences in the neurocognitive measures examined in the BrainCheck battery, future research should utilize a more evenly distributed ratio of males to females in the participants pool. Additionally, despite being a statistically

significant predictor, the coordination test occasionally suffered from software malfunctioning during testing, and resulted in several cases of missing data in both the experimental and control groups. As a retrospective study, it is hard to determine if all cases of malfunctioning were properly documented and fully taken into consideration.

Currently there are a variety of different test batteries and screeners used in clinical practice to aid in the diagnosis of mTBI. BrainCheck provides another option among the computerized neurocognitive tests by providing a shorter, gamified test battery that attempts to comprehensively examine and assess cognitive functioning after brain injury. Here we demonstrate BrainCheck performs well in detecting and classifying mTBI patients, which may be useful as a diagnostic aid.

### **Conflict of Interest Statement**

The following authors declare the following competing interests: SY, BF, YK, BH, RHG reports personal fees from BrainCheck, outside the submitted work; DME, BF, YK, BH, RHG reports receiving stock options from BrainCheck.

### **Acknowledgments**

Funding was provided by BrainCheck, Inc.

### **Data Availability**

Data may be made available by contacting the corresponding author and with a data use agreement.

### **References**

Alsalaheen, B., Stockdale, K., Pechumer, D., & Broglio, S. P. (2016a). Measurement error in the immediate postconcussion assessment and cognitive testing (ImPACT): systematic review. *Journal of Head Trauma Rehabilitation*, 31(4), 242–251.

<https://doi.org/10.1097/HTR.000000000000175>

- Alsalaheen, B., Stockdale, K., Pechumer, D., & Broglio, S. P. (2016b). Validity of the immediate post concussion assessment and cognitive testing (ImPACT). *Sports Medicine*, *46*(10), 1487–1501. <https://doi.org/10.1007/s40279-016-0532-y>
- Amyot, F., Arciniegas, D. B., Brazaitis, M. P., Curley, K. C., Diaz-Arrastia, R., Gandjbakhche, A., ... Stocker, D. (2015). A review of the effectiveness of neuroimaging modalities for the detection of traumatic brain injury. *Journal of Neurotrauma*, *32*(22), 1693–1721. <https://doi.org/10.1089/neu.2013.3306>
- Anderson, V., Catroppa, C., Morse, S., Haritou, F., & Rosenfeld, J. (2001). outcome from mild head injury in young children: a prospective study. *Journal of Clinical and Experimental Neuropsychology*, *23*(6), 705–717. <https://doi.org/10.1076/jcen.23.6.705.1015>
- Barlow, K. M., Crawford, S., Stevenson, A., Sandhu, S. S., Belanger, F., & Dewey, D. (2010). epidemiology of postconcussion syndrome in pediatric mild traumatic brain injury. *Pediatrics*, *126*(2), e374–e381. <https://doi.org/10.1542/peds.2009-0925>
- Bazarian, J. J., Blyth, B., Mookerjee, S., He, H., & McDermott, M. P. (2010). sex differences in outcome after mild traumatic brain injury. *Journal of Neurotrauma*, *27*(3), 527–539. <https://doi.org/10.1089/neu.2009.1068>
- Beaumont, Louis De, Hugo Thoret, David Mongeon, Julie Messier, Suzanne Leclerc, Sbastien Tremblay, Dave Ellemberg, and Maryse Lassonde. (2009). Brain function decline in healthy retired athletes who sustained their last sports concussion in early adulthood. *Brain* *132* (3): 695–708. <https://doi.org/10.1093/brain/awn347>.
- Boutis, K., Weerdenburg, K., Koo, E., Schneeweiss, S., & Zemek, R. (2015). the diagnosis of concussion in a pediatric emergency department. *The Journal of Pediatrics*, *166*(5), 1214–1220.e1. <https://doi.org/10.1016/j.jpeds.2015.02.013>
- Broglio, S. P., Ferrara, M. S., Macciocchi, S. N., Baumgartner, T. A., & Elliott, R. (2007). Test-retest reliability of computerized concussion assessment programs. *Journal of Athletic Training*, *42*(4), 509–514.
- Broglio, S. P., Guskiewicz, K. M., & Norwig, J. (2017). If you're not measuring, you're guessing: the advent of objective concussion assessments. *Journal of Athletic Training*, *52*(3), 160–166. <https://doi.org/10.4085/1062-6050-51.9.05>

- Brooks, M. A., Snedden, T. R., Mixis, B., Hetzel, S., & McGuine, T. A. (2017). establishing baseline normative values for the child sport concussion assessment tool. *JAMA Pediatrics*, *171*(7), 670–677. <https://doi.org/10.1001/jamapediatrics.2017.0592>
- Brown, J. A., Dalecki, M., Hughes, C., Macpherson, A. K., & Sergio, L. E. (2015). Cognitive-motor integration deficits in young adult athletes following concussion. *BMC Sports Science, Medicine and Rehabilitation*, *7*(1). <https://doi.org/10.1186/s13102-015-0019-4>
- Brown, N. J., Mannix, R. C., O'Brien, M. J., Gostine, D., Collins, M. W., & Meehan, W. P. (2014). Effect of cognitive activity level on duration of post-concussion symptoms. *Pediatrics*, peds.2013-2125. <https://doi.org/10.1542/peds.2013-2125>
- Centers for Disease Control and Prevention. (2011). Nonfatal traumatic brain injuries related to sports and recreation activities among persons aged  $\leq 19$  years--United States, 2001-2009. *MMWR. Morbidity and Mortality Weekly Report*, *60*(39), 1337–1342.
- Chin, E. Y., Nelson, L. D., Barr, W. B., McCrory, P., & McCrea, M. A. (2016). reliability and validity of the Sport Concussion Assessment Tool–3 (SCAT3) in high school and collegiate athletes. *The American Journal of Sports Medicine*, *44*(9), 2276–2285. <https://doi.org/10.1177/0363546516648141>
- Collins, M. W., Grindel, S. H., Lovell, M. R., Dede, D. E., Moser, D. J., Phalin, B. R., ... McKeag, D. B. (1999). relationship between concussion and neuropsychological performance in college football players. *JAMA*, *282*(10), 964–970. <https://doi.org/10.1001/jama.282.10.964>
- Covassin, Tracey, Tracey Covassin, and Elbin. (2010). “the cognitive effects and decrements following concussion.” *Open Access Journal of Sports Medicine* *1* (5): 55. <https://doi.org/10.2147/oajsm.s6919>.
- Davis, G. A., Anderson, V., Babl, F. E., Gioia, G. A., Giza, C. C., Meehan, W., ... Zemek, R. (2017). What is the difference in concussion management in children as compared with adults? A systematic review. *Br J Sports Med*, bjsports-2016-097415. <https://doi.org/10.1136/bjsports-2016-097415>
- De Beaumont, L., Thoret, H., Mongeon, D., Messier, J., Leclerc, S., Tremblay, S., Elleberg, D., & Lassonde, M. (2009). Brain function decline in healthy retired athletes who sustained their



last sports concussion in early adulthood. *Brain*, 132(3), 695–708.

<https://doi.org/10.1093/brain/awn347>

DeMatteo, C. A., Hanna, S. E., Mahoney, W. J., Hollenberg, R. D., Scott, L. A., Law, M. C., ...

Xu, L. (2010). My child doesn't have a brain injury, he only has a concussion. *Pediatrics*,

125(2), 327–334. <https://doi.org/10.1542/peds.2008-2720>

Echemendia, R. J., Iverson, G. L., McCrea, M., Macciocchi, S. N., Gioia, G. A., Putukian, M., &

Comper, P. (2013). Advances in neuropsychological assessment of sport-related concussion. *Br J*

*Sports Med*, 47(5), 294–298. <https://doi.org/10.1136/bjsports-2013-092186>

Eierud, C., Craddock, R. C., Fletcher, S., Aulakh, M., King-Casas, B., Kuehl, D., & LaConte, S.

M. (2014). Neuroimaging after mild traumatic brain injury: Review and meta-analysis.

*NeuroImage : Clinical*, 4, 283–294. <https://doi.org/10.1016/j.nicl.2013.12.009>

Ellis, M. J., Leiter, J., Hall, T., McDonald, P. J., Sawyer, S., Silver, N., ... Essig, M. (2015).

Neuroimaging findings in pediatric sports-related concussion. *Journal of Neurosurgery:*

*Pediatrics*, 16(3), 241–247. <https://doi.org/10.3171/2015.1.PEDS14510>

Erlanger, D., Saliba, E., Barth, J., Almquist, J., Webright, W., & Freeman, J. (2001). monitoring

resolution of postconcussion symptoms in athletes: preliminary results of a web-based

neuropsychological test protocol. *Journal of Athletic Training*, 36(3), 280–287.

Falk, A.-C., Cederfjäll, C., Wendt, L. von, & Söderkvist, B. K. (2005). Management and

classification of children with head injury. *Child's Nervous System*, 21(6), 430–436.

<https://doi.org/10.1007/s00381-005-1142-4>

Fazio, V. C., Lovell, M. R., Pardini, J. E., & Collins, M. W. (2007). The relation between post

concussion symptoms and neurocognitive performance in concussed athletes.

*NeuroRehabilitation*, 22(3), 207–216.

Field, M., Collins, M. W., Lovell, M. R., & Maroon, J. (2003). Does age play a role in recovery

from sports-related concussion? A comparison of high school and collegiate athletes. *The*

*Journal of Pediatrics*, 142(5), 546–553. <https://doi.org/10.1067/mpd.2003.190>

Ganti, L., Daneshvar, Y., Ayala, S., Bodhit, A. N., & Peters, K. R. (2016). The value of

neurocognitive testing for acute outcomes after mild traumatic brain injury. *Military Medical*

*Research; London, 3, n/a.*

<https://doi.org/http://dx.doi.org.ezhost.utrgv.edu:2048/10.1186/s40779-016-0091-4>

Gaudet, C. E., & Weyandt, L. L. (2017). Immediate Post-Concussion and Cognitive Testing (ImPACT): a systematic review of the prevalence and assessment of invalid performance. *The Clinical Neuropsychologist, 31*(1), 43–58. <https://doi.org/10.1080/13854046.2016.1220622>

Grindel, S. H., Lovell, M. R., & Collins, M. W. (2001). The assessment of sport-related concussion: the evidence behind neuropsychological testing and management. *Clinical Journal of Sport Medicine: Official Journal of the Canadian Academy of Sport Medicine, 11*(3), 134–143.

Grubenhoff, J. A., Deakne, S. J., Comstock, R. D., Kirkwood, M. W., & Bajaj, L. (2015). Outpatient follow-up and return to school after emergency department evaluation among children with persistent post-concussion symptoms. *Brain Injury, 29*(10), 1186–1191. <https://doi.org/10.3109/02699052.2015.1035325>

Guskiewicz, K. M. (2003). Assessment of postural stability following sport-related concussion. *Current Sports Medicine Reports, 2*(1), 24–30.

Halstead, M. E., Walter, K. D., & Fitness, T. C. on S. M. and. (2010). Sport-related concussion in children and adolescents. *Pediatrics, 126*(3), 597–615. <https://doi.org/10.1542/peds.2010-2005>

Hinton-Bayre, A. D., Geffen, G. M., Geffen, L. B., McFarland, K. A., & Frijs, P. (1999). Concussion in contact sports: reliable change indices of impairment and recovery. *Journal of Clinical and Experimental Neuropsychology (Neuropsychology, Development and Cognition: Section A), 21*(1), 70–86. <https://doi.org/10.1076/jcen.21.1.70.945>

Hinton-Bayre, A. D., Geffen, G., & McFarland, K. (1997). Mild head injury and speed of information processing: a prospective study of professional rugby league players. *Journal of Clinical and Experimental Neuropsychology, 19*(2), 275–289. <https://doi.org/10.1080/01688639708403857>

Iverson, G. L., & Schatz, P. (2015). Advanced topics in neuropsychological assessment following sport-related concussion. *Brain Injury, 29*(2), 263–275. <https://doi.org/10.3109/02699052.2014.965214>

Karr, J. E., Areshenkoff, C. N., & Garcia-Barrera, M. A. (2014). The neuropsychological outcomes of concussion: A systematic review of meta-analyses on the cognitive sequelae of mild traumatic brain injury. *Neuropsychology*, *28*(3), 321–336.

<https://doi.org/http://dx.doi.org.ezhost.utrgv.edu:2048/10.1037/neu0000037>

Leclerc, S., Lassonde, M., Delaney, J. S., Lacroix, V. J., & Johnston, K. M. (2001). Recommendations for grading of concussion in athletes. *Sports Medicine*, *31*(8), 629–636.

<https://doi.org/10.2165/00007256-200131080-00007>

Leininger, B. E., S. E. Gramling, A. D. Farrell, J. S. Kreutzer, and E. A. Peck. (1990). Neuropsychological deficits in symptomatic minor head injury patients after concussion and mild concussion. *Journal of Neurology Neurosurgery and Psychiatry* *53* (4): 293–96.

<https://doi.org/10.1136/jnnp.53.4.293>.

Lovell, M. R., Collins, M. W., Iverson, G. L., Field, M., Maroon, J. C., Cantu, R., ... Fu, F. H. (2003). Recovery from mild concussion in high school athletes. *Journal of Neurosurgery*, *98*(2), 296–301. <https://doi.org/10.3171/jns.2003.98.2.0296>

Lumba-Brown, A., Yeates, K. O., Sarmiento, K., Breiding, M. J., Haegerich, T. M., Gioia, G. A., Turner, M., Benzel, E. C., Suskauer, S. J., Giza, C. C., Joseph, M., Broomand, C., Weissman, B., Gordon, W., Wright, D. W., Moser, R. S., McAvoy, K., Ewing-Cobbs, L., Duhaime, A. C., ... Timmons, S. D. (2018). Centers for disease control and prevention guideline on the diagnosis and management of mild traumatic brain injury among children. In *JAMA Pediatrics* (Vol. 172, Issue 11). American Medical Association. <https://doi.org/10.1001/jamapediatrics.2018.2853>

McClincy, M. P., Lovell, M. R., Pardini, J., Collins, M. W., & Spore, M. K. (2006). Recovery from sports concussion in high school and collegiate athletes. *Brain Injury*, *20*(1), 33–39.

<https://doi.org/10.1080/02699050500309817>

McCrea, M., Guskiewicz, K. M., Marshall, S. W., Barr, W., Randolph, C., Cantu, R. C., ...

Kelly, J. P. (2003). Acute effects and recovery time following concussion in collegiate football players: The NCAA concussion study. *JAMA*, *290*(19), 2556–2563.

<https://doi.org/10.1001/jama.290.19.2556>

- McCrorry, P., Collie, A., Anderson, V., & Davis, G. (2004). Can we manage sport related concussion in children the same as in adults? *British Journal of Sports Medicine*, *38*(5), 516–519. <https://doi.org/10.1136/bjism.2004.014811>
- McCrorry, P., Meeuwisse, W. H., Aubry, M., Cantu, R. C., Dvořák, J., Echemendia, R. J., ... Turner, M. (2013). Consensus statement on concussion in sport: the 4th international conference on concussion in sport, Zurich, November 2012. *Journal of Athletic Training*, *48*(4), 554–575. <https://doi.org/10.4085/1062-6050-48.4.05>
- Meehan, W. P., d’Hemecourt, P., Collins, C. L., Taylor, A. M., & Comstock, R. D. (2012). Computerized neurocognitive testing for the management of sport-related concussions. *Pediatrics*, *129*(1), 38–44. <https://doi.org/10.1542/peds.2011-1972>
- Meier, T. B., Brummel, B. J., Singh, R., Nerio, C. J., Polanski, D. W., & Bellgowan, P. S. F. (2015). The underreporting of self-reported symptoms following sports-related concussion. *Journal of Science and Medicine in Sport*, *18*(5), 507–511. <https://doi.org/10.1016/j.jsams.2014.07.008>
- Miller, J. H., Gill, C., Kuhn, E. N., Rocque, B. G., Menendez, J. Y., O’Neill, J. A., ... Johnston, J. M. (2015). Predictors of delayed recovery following pediatric sports-related concussion: a case-control study. *Journal of Neurosurgery: Pediatrics*, *17*(4), 491–496. <https://doi.org/10.3171/2015.8.PEDS14332>
- Moore, D. R., Pindus, D. M., Raine, L. B., Drollette, E. S., Scudder, M. R., Ellemberg, D., & Hillman, C. H. (2016). The persistent influence of concussion on attention, executive control and neuroelectric function in preadolescent children. *International Journal of Psychophysiology*, *99*, 85–95. <https://doi.org/10.1016/j.ijpsycho.2015.11.010>
- Moser, R. S., Iverson, G. L., Echemendia, R. J., Lovell, M. R., Schatz, P., Webbe, F. M., ... Barth, J. T. (2007). Neuropsychological evaluation in the diagnosis and management of sports-related concussion. *Archives of Clinical Neuropsychology*, *22*(8), 909–916. <https://doi.org/10.1016/j.acn.2007.09.004>
- Munivenkatappa, A., Agrawal, A., Shukla, D. P., Kumaraswamy, D., & Devi, B. I. (2016). Traumatic brain injury: Does gender influence outcomes? *International Journal of Critical Illness and Injury Science*, *6*(2), 70–73. <https://doi.org/10.4103/2229-5151.183024>

- Peterson, S. E., Stull, M. J., Collins, M. W., & Wang, H. E. (2009). Neurocognitive function of emergency department patients with mild traumatic brain injury. *Annals of Emergency Medicine*, 53(6), 796–803.e1. <https://doi.org/10.1016/j.annemergmed.2008.10.015>
- Pfister, T., Pfister, K., Hagel, B., Ghali, W. A., & Ronksley, P. E. (2016). The incidence of concussion in youth sports: a systematic review and meta-analysis. *Br J Sports Med*, 50(5), 292–297. <https://doi.org/10.1136/bjsports-2015-094978>
- Ph.D, M. W. K., Yeates, K. O., Taylor, H. G., Randolph, C., McCrea, M., & Anderson, V. A. (2008). Management of pediatric mild traumatic brain injury: a neuropsychological review From Injury Through Recovery. *The Clinical Neuropsychologist*, 22(5), 769–800. <https://doi.org/10.1080/13854040701543700>
- Ponsford, J., Willmott, C., Rothwell, A., Cameron, P., Ayton, G., Nelms, R., ... Ng, K. (2001). Impact of early intervention on outcome after mild traumatic brain injury in children. *Pediatrics*, 108(6), 1297–1303. <https://doi.org/10.1542/peds.108.6.1297>
- Satz, P. (2001). Mild head injury in children and adolescents. *Current Directions in Psychological Science*, 10(3), 106–109.
- Schatz, P., Pardini, J. E., Lovell, M. R., Collins, M. W., & Podell, K. (2006). Sensitivity and specificity of the ImpACT Test Battery for concussion in athletes. *Archives of Clinical Neuropsychology*, 21(1), 91–99. <https://doi.org/10.1016/j.acn.2005.08.001>
- Schatz, P., & Zillmer, E. A. (2003). Computer-Based Assessment of Sports-Related Concussion. *Applied Neuropsychology*, 10(1), 42–47. [https://doi.org/10.1207/S15324826AN1001\\_6](https://doi.org/10.1207/S15324826AN1001_6)
- Sim, A., Terryberry-Spohr, L., & Wilson, K. R. (2008). Prolonged recovery of memory functioning after mild traumatic brain injury in adolescent athletes. *Journal of Neurosurgery*, 108(3), 511–516. <https://doi.org/10.3171/JNS/2008/108/3/0511>
- Sroufe, N. S., Fuller, D. S., West, B. T., Singal, B. M., Warschausky, S. A., & Maio, R. F. (2010). Postconcussive symptoms and neurocognitive function after mild traumatic brain injury in children. *Pediatrics*, 125(6), e1331–e1339. <https://doi.org/10.1542/peds.2008-2364>
- Sullivan, D. R. (2019). A cerebrovascular hypothesis of neurodegeneration in mTBI. In *Journal of Head Trauma Rehabilitation* (Vol. 34, Issue 3, pp. E18–E27). Lippincott Williams and Wilkins. <https://doi.org/10.1097/HTR.0000000000000449>

Talavage, T. M., Nauman, E. A., Breedlove, E. L., Yoruk, U., Dye, A. E., Morigaki, K. E., ... Leverenz, L. J. (2010). Functionally-detected cognitive impairment in high school football players without clinically-diagnosed concussion. *Journal of Neurotrauma*, *31*(4), 327–338.

<https://doi.org/10.1089/neu.2010.1512>

Ting, Windsor Kwan-Chun, Tom A. Schweizer, Jane Topolovec-Vranic, and Michael D. Cusimano. (2016). Antisaccadic eye movements are correlated with corpus callosum white matter mean diffusivity, stroop performance, and symptom burden in mild traumatic brain injury and concussion. *Frontiers in Neurology* 6 (JAN): 271. <https://doi.org/10.3389/fneur.2015.00271>.

Thomas, D. G., Collins, M. W., Saladino, R. A., Frank, V., Raab, J., & Zuckerbraun, N. S. (2011). Identifying neurocognitive deficits in adolescents following concussion. *Academic Emergency Medicine: Official Journal of the Society for Academic Emergency Medicine*, *18*(3), 246–254. <https://doi.org/10.1111/j.1553-2712.2011.01015.x>

Van Kampen, D. A., Lovell, M. R., Pardini, J. E., Collins, M. W., & Fu, F. H. (2006). The “value added” of neurocognitive testing after sports-related concussion. *The American Journal of Sports Medicine*, *34*(10), 1630–1635. <https://doi.org/10.1177/0363546506288677>

Yang, S., Flores, B., Magal, R., Harris, K., Gross, J., Ewbank, A., ... Eagleman, D. M. (2017). Diagnostic accuracy of tablet-based software for the detection of concussion. *PLOS ONE*, *12*(7), e0179352. <https://doi.org/10.1371/journal.pone.0179352>
